# Supplementary material for: Effectiveness of Virtual Nurse Interventions in Chronic Disease Self-Management: A Systematic Review of Randomized Controlled Trials
Source: Research Square preprint supplement (doi:10.21203/rs.3.rs-8182311/v1), 2025-12-16
Supplement: Supplementary file 1 [file ec4abbe9cee3f0e35f2b2d00.docx]

**Supplemental Material**

| **Table S1**. **SWiM (Synthesis Without Meta-analysis) Reporting Checklist** | | |
| --- | --- | --- |
| **SWiM reporting item** | **Item descriptio** | **Page in manuscript where item is reported** |
| ***Methods*** | | |
| 1. Grouping studies for synthesis | 1a) Provide a description of, and rationale for, the groups used in the synthesis (e.g., groupings of populations, interventions, outcomes, study design) | Studies were grouped according to disease type (e.g., type 2 diabetes mellitus, atrial fibrillation, heart failure) and virtual nurse interface (e.g., avatar, relational agent, and AI-driven digital characteristics). This grouping facilitated meaningful synthesis across comparable populations and intervention formats, allowing comparison within outcome domains. → *Reported in Section 3.2 (p. 6-7); summarized in Table 2 and Table 3.* |
| 1b) Detail and provide rationale for any changes made subsequent to the protocol in the groups used in the synthesis | No changes were made to the grouping strategy from the PROSPERO-registered protocol. The planned grouping structure was maintained throughout the synthesis. → *Reported in Section 2.1 (p. 4).* |
| 1. Describe the standardized metric and transformation methods used | Describe the standardised metric for each outcome. Explain why the metric(s) was chosen, and describe any methods used to transform the intervention effects, as reported in the study, to the standardised metric, citing any methodological guidance consulted | No standardized metrics or transformations were applied. All findings were extracted and reported using the original effect formats provided in the studies (e.g., p-values, confidence intervals, mean differences). Due to high variability in outcome definitions and measurement tools, converting results to a common metric was not feasible. → *Described in Section 3.5 (p. 8–9).* |
| 1. Describe the synthesis methods | Describe and justify the methods used to synthesise the effects for each outcome when it was not possible to undertake a meta-analysis of effect estimates | A narrative synthesis approach was adopted and organized across five outcome domains: health knowledge, behavioral change, physiological indicators, psychological wellbeing, and patient satisfaction. This approach enabled integration of conceptually related outcomes despite heterogeneity in designs and measurement tools. → *Detailed in Section 3.5 (p. 8–9; supported by Table 3.* |
| 1. Criteria used to prioritise results for summary and synthesis | Where applicable, provide the criteria used, with supporting justification, to select the particular studies, or a particular study, for the main synthesis or to draw conclusions from the synthesis (e.g., based on study design, risk of bias assessments, directness in relation to the review question) | All six randomized controlled trials were synthesized equally, with no prioritization of any single study. However, emphasis was placed on outcomes most relevant to the review objective, such as knowledge gains, self-management and psychological support. → *Discussed in Section 3.5 (pp. 8-9).* |
| 1. Investigation of heterogeneity in reported effects | State the method(s) used to examine heterogeneity in reported effects when it was not possible to undertake a meta-analysis of effect estimates and its extensions to investigate heterogeneity | Heterogeneity was assessed descriptively by comparing variation in intervention platforms, durations, outcome types, and assessment tools. No statistical heterogeneity analysis was conducted, as meta-analysis was not performed. → *Discussed in Sections 3.2 (p. 7).* |
| 1. Certainty of evidence | Describe the methods used to assess certainty of the synthesis findings | The GRADE approach was not applied due to the small number and heterogeneity of included studies. Instead, the methodological quality of each study was evaluated using the JBI RCT appraisal tool. Scores ranged from 9 to 10, indicating moderate to high quality. These assessments informed the interpretation of findings. → *Reported in Sections 2.4 and 3.3 (pp.5, 7); see Table 4.* |
| 1. Data presentation methods | Describe the graphical and tabular methods used to present the effects (e.g., tables, forest plots, harvest plots). Specify key study characteristics (e.g., study design, risk of bias) used to order the studies, in the text  and any tables or graphs, clearly referencing the studies included | Effects were presented using structured summary tables: Table 2 outlines study characteristics and intervention platforms; Table 3 categorizes synthesized outcomes across five domains. Key characteristics (e.g., study design, virtual nurse format) were used to organize the studies, with explicit reference to each source. → *Presented in Tables 2 and 3 .* |
| ***Results*** | | |
| 1. Reporting results | For each comparison and outcome, provide a description of the synthesised findings, and the certainty of the findings. Describe the result in language that is consistent with the question the synthesis addresses, and indicate which studies contribute to the synthesis | Findings were narratively synthesized across outcome domains, summarizing the direction, strength, and statistical significance of effects. Contributions of individual studies were clearly identified. Certainty of findings was addressed via quality appraisal rather than quantitative scoring. → *Described in Section 3.5 (pp. 8–9; summarized in Table 3.* |
| ***Discussion*** | | |
| 1. Limitations of the synthesis | Report the limitations of the synthesis methods used and/or the groupings used in the synthesis, and how these affect the conclusions that can be drawn in relation to the original review question | The synthesis was limited by a small number of included studies (n = 6), substantial heterogeneity in intervention formats, measurement tools, and follow-up durations. These constraints prevented meta-analysis and limited generalizability. Most studies were conducted in high-income countries, limiting cultural and geographical applicability. → *Addressed in Section 4.5 (p. 13)* |

**Table S2. Keywords and search results in different databases**

| Database | Keyword | Filter | Date | Results |
| --- | --- | --- | --- | --- |
| PubMed | (“virtual nurse” OR “avatar” OR “relational agent” OR “embodied conversational agent”) AND (“digital health” OR “self-management”) AND (“chronic disease” OR “patient education”) | NA | April 2025 | 55 |
| Cochrane Library | (“virtual nurse” OR “avatar” OR “relational agent” OR “embodied conversational agent”) AND (“digital health” OR “self-management”) AND (“chronic disease” OR “patient education”) | NA | April 2025 | 21 |
| CINAHL | (“virtual nurse” OR “avatar” OR “relational agent” OR “embodied conversational agent”) AND (“digital health” OR “self-management”) AND (“chronic disease” OR “patient education”) | NA | April 2025 | 20 |
| MEDLINE | (“virtual nurse” OR “avatar” OR “relational agent” OR “embodied conversational agent”) AND (“digital health” OR “self-management”) AND (“chronic disease” OR “patient education”) | NA | April 2025 | 9 |
| EMBASE | (“virtual nurse” OR “avatar” OR “relational agent” OR “embodied conversational agent”) AND (“digital health” OR “self-management”) AND (“chronic disease” OR “patient education”) | NA | April 2025 | 18 |

NA: not applied

| **Table S3. Joanna Briggs Institute Quality Appraisal for Included RCTs** | | | | | | |
| --- | --- | --- | --- | --- | --- | --- |
| **Appraisal Item** | **Rosal**  **et al.**  **(2014)** | **Magnani et al. (2017)** | **Tongpeth et al. (2020)** | **Gong et al. (2020)** | **Guhl et al. (2020)** | **Wonggom et al. (2020)** |
| Was true randomization used for assignment of participants to treatment groups? | Y | Y | Y | Y | Y | Y |
| Was allocation to treatment groups concealed? | U | Y | U | Y | Y | U |
| Were treatment groups similar at the baseline? | Y | Y | Y | Y | Y | Y |
| Were participants blind to treatment assignment? | N | N | N | N | N | N |
| Were those delivering treatment blind to treatment assignment? | N | N | N | N | N | N |
| Were outcomes assessors blind to treatment assignment? | U | U | U | U | U | U |
| Were treatment groups treated identically other than the intervention of interest? | Y | Y | Y | Y | Y | Y |
| Was follow up complete and if not, were differences between groups in terms of their follow up adequately described and analyzed? | Y | Y | Y | Y | Y | Y |
| Were participants analyzed in the groups to which they were randomized? | Y | Y | Y | Y | Y | Y |
| Were outcomes measured in the same way for treatment groups? | Y | Y | Y | Y | Y | Y |
| Were outcomes measured in a reliable way? | Y | Y | Y | Y | Y | Y |
| Was appropriate statistical analysis used? | Y | Y | Y | Y | Y | Y |
| Was true randomization used for assignment of participants to treatment groups? | Y | Y | Y | Y | Y | Y |
| **Overall Score (out of 13)** | 9 | 10 | 9 | 10 | 10 | 9 |
| **Note:** Y = Yes; N = No; U = Unclear; NA = Not applicable | | | | | | |
